# Supplementary material for: Identification of Keratinocyte Growth Factor as a Target of microRNA-155 in Lung Fibroblasts: Implication in Epithelial-Mesenchymal Interactions
Source: PubMed Central journal article supplement (PMC2726943; doi:10.1371/journal.pone.0006718), 2009-08-24
Supplement: pone.0006718.s003.pdf [file pone.0006718.s003.pdf]

| ID    | Name           | Expression value |      |
|-------|----------------|------------------|------|
|       |                | HFL1             | A549 |
| 8311  | hsa-let-7i     | 1291             | 4047 |
| 7293  | hsa-mir-125b-1 | 5990             | 1592 |
| 7301  | hsa-mir-129-1  | 1208             | 440  |
| 8296  | hsa-mir-130a   | 1484             | 675  |
| 7331  | hsa-mir-143    | 1557             | 192  |
| 7333  | hsa-mir-145    | 1881             | 189  |
| 7351  | hsa-mir-155    | 1907             | 235  |
| 7456  | hsa-mir-192    | 202              | 1125 |
| 8242  | hsa-mir-193b   | 398              | 1224 |
| 7459  | hsa-mir-194-1  | 193              | 1123 |
| 7468  | hsa-mir-199a-2 | 3697             | 163  |
| 7496  | hsa-mir-21     | 1175             | 5648 |
| 7506  | hsa-mir-214    | 1043             | 249  |
| 7519  | hsa-mir-221    | 10042            | 1761 |
| 7521  | hsa-mir-222    | 7734             | 2000 |
| 8202  | hsa-mir-27b    | 670              | 3006 |
| 8187  | hsa-miR-30a-5p | 500              | 1867 |
| 7650  | hsa-mir-30d    | 591              | 1766 |
| 7677  | hsa-mir-31     | 1142             | 5617 |
| 8094  | hsa-mir-513-2  | 1752             | 285  |
| 14233 | hsa-mir-595    | 3235             | 819  |
