# Supplementary material for: Identification of Keratinocyte Growth Factor as a Target of microRNA-155 in Lung Fibroblasts: Implication in Epithelial-Mesenchymal Interactions
Source: PubMed Central journal article supplement (PMC2726943; doi:10.1371/journal.pone.0006718), 2009-08-24
Supplement: pone.0006718.s004.pdf [file pone.0006718.s004.pdf]

| Category                                   | P-value 24h | P-value 48h | Molecules (24h)                                                                                                                                                                                                                                                 | Molecules (48h)                                                                                                                                                                                                                                                                                                                                                                                                                                                                                                                                                                                                                                                                                                                                                                                                                                                                                                                                                                                                                                      |
|--------------------------------------------|-------------|-------------|-----------------------------------------------------------------------------------------------------------------------------------------------------------------------------------------------------------------------------------------------------------------|------------------------------------------------------------------------------------------------------------------------------------------------------------------------------------------------------------------------------------------------------------------------------------------------------------------------------------------------------------------------------------------------------------------------------------------------------------------------------------------------------------------------------------------------------------------------------------------------------------------------------------------------------------------------------------------------------------------------------------------------------------------------------------------------------------------------------------------------------------------------------------------------------------------------------------------------------------------------------------------------------------------------------------------------------|
| Amino Acid Metabolism                      | 6.32E-03    | 4.82E-04    | ANXA2, DHFR, DIO2, GFPT2                                                                                                                                                                                                                                        | GLS, GFPT2                                                                                                                                                                                                                                                                                                                                                                                                                                                                                                                                                                                                                                                                                                                                                                                                                                                                                                                                                                                                                                           |
| Carbohydrate Metabolism                    | 6.32E-03    | ns          | NT5E, UAP1                                                                                                                                                                                                                                                      |                                                                                                                                                                                                                                                                                                                                                                                                                                                                                                                                                                                                                                                                                                                                                                                                                                                                                                                                                                                                                                                      |
| Cell Cycle                                 | 4.76E-04    | 3.39E-08    | ADM, AKAP12, YWHAG, BTG3, WEE1, CDK6, IRF9, ID3, IVNS1ABP, HMOX1, SPRY2, GMNN, CXCL12, UBE2V1, ZAK, IFITM1, NEUROG1, CYR61, IL11                                                                                                                                | KIF23, DLGAP5, PLK3, NCAPG, SMAD3, UBE2V2, CCNB2, KRAS, ROCK2, CCNG1, CAV1, ITGAV, TUBB3, YWHAG, THBS1, WEE1, CDK6, IRF9, ANLN, EIF3E, STAT3, TPX2, AREG, PPP2CB, IRF7, PTPN11, BHLHB2, ZAK, IGFBP3, CYR61, ADM, AKAP12, SULF1, TPM1, SH3BP4, ID2, BTG3, TPDS2L1, HIF1A, NGF, EIF4E, ID1, CCNA2, HMOX1, GFRA1, GMNN, SIPA1, UBE2V1, TOP2A, IFITM1, UBE2D3, CTNNB1, STAT1, FGF7, CITED2, RAD21, ITGB1, PPARG, NUSAP1, TNC, CCNB1, AXL, CDC2, BUB1, KITLG, IVNS1ABP, PEA15, NEUROG1, BTRC, IL11                                                                                                                                                                                                                                                                                                                                                                                                                                                                                                                                                        |
| Cell Death                                 | 2.36E-04    | 4.51E-13    | ADM, HTR2B, BDNF, GNB1, HMOX1, GDF5, GMNN, UBE2V1, ANTXR2, AKT3, IFI6, CBFB, RHEB, MMP1, WEE1, RDX, CDK6, ITGA6, CIDEC, GREM1, ID3, TXNRD1, RASD1, ISG15, EMP1, IVNS1ABP, ADAM12, CXCL12, ZAK, CYR61, STEAP3, IL11                                              | PLD2, CTGF, HTR2B, PLK3, HMMR, KRAS, TXNDC5, ODC1, CCNG1, GNB1, PKN2, MYLK, GDF5, EZR, VAMP3, CAV1, CBFB, ITGB5, SHISAS, RRM2, CIDEC, STAT3, ROR1, NDN, AREG, MAP3K12, CD9, BHLHB2, SNAI2, ZAK, THBS2, CYR61, TMEM158, STEAP3, ADM, BDNF, TPDS2L1, DMD, INPP5A, EIF4E, VCAN, ID1, BBC3, ANTXR2, TOP2A, DAB2, IFI6, DUSP14, CTNNB1, FGF7, RAD21, CITED2, MMP1, ITGB1, PDZK1, CCNB1, TNC, GREM1, AXL, OAS3, F3, CYP1B1, CDC2, BUB1, KITLG, PLA2G4A, BMF, PEA15, PROC, CD82, BTRC, ABCC3, PTGR1, ICMT, SMAD3, CSNK1A1, OLR1, CYFIP2, ITGAV, RHEB, DSP, TNFRSF11B, TUBB3, FST, THBS1, WEE1, RDX, CDK6, TXNRD1, RCAN1, RASD1, PDLIM4, NPC1, ADAM12, PTPN11, IGFBP3, LRDD, PMEPA1, PEBP1, SULF1, TPM1, ID2, RECK, HIF1A, NGF, TCF12, PDCD4, CIAPIN1, CCNA2, HMOX1, GMNN, GFRA1, UBE2V1, STAT1, MAGEH1, RAD23B, PPARG, TIMP3, MX1, FDXR, SERPINE2, FMPD1, IVNS1ABP, DMDP2, PRKCI, RAS2, CATB1, DKK1, IL11                                                                                                                                                   |
| Cell Morphology                            | 8.16E-04    | 9.90E-06    | ADM, SLC14A1, BDNF, SPRY2, CXCL12, RDX, ITGA6, CDK6, ANXA2, CYR61, ID3                                                                                                                                                                                          | ICMT, RIT1, PLK3, SMAD3, KRAS, OLR1, ODC1, ROCK2, EZR, CAV1, ITGAV, CBFB, ITGB5, PDXL, FST, THBS1, FERMT2, CDK6, RDX, ANXA2, STAT3, ROR1, RCAN1, NDN, STC1, NPC1, MAP3K12, SDCBP, PTPN11, CD9, RND3, BHLHB2, SNAI2, THBS2, ZAK, IGFBP3, DHFR, FOXF1, CYR61, RAP2A, ADM, RAP1B, PEBP1, SULF1, TPM1, ID2, BDNF, RECK, NGF, EIF4E, VCAN, PDCD4, ID1, HMOX1, SH3D19, CCNA2, SIPA1, DAB2, NLF, ASPH, MARCKS, CTNNB1, FGF7, CITED2, RAD21, PPARG, ITGB1, TIMP3, TNC, AXL, CDC2, KITLG, PMP22, RAS2, PRKCI, CAP2, CD82, DKK1, WNT5A                                                                                                                                                                                                                                                                                                                                                                                                                                                                                                                         |
| Cell Signaling                             | 1.38E-03    | ns          | GNB1, ADM, TBCA, CXCL12, DIO2, RASD1, ABCA1, TXNRD1, OXTR                                                                                                                                                                                                       |                                                                                                                                                                                                                                                                                                                                                                                                                                                                                                                                                                                                                                                                                                                                                                                                                                                                                                                                                                                                                                                      |
| Cell-To-Cell Signaling and Interaction     | 5.91E-06    | 2.38E-08    | ADM, KCNN2, BDNF, RDX, ITGA6, GREM1, ANXA2, ID3, ABCA1, TXNRD1, STC1, HMOX1, MICB, ADAM12, CXCL12, SRXN1, TULP4, CYR61, MMP1, OXTR, IL11                                                                                                                        | C1ORF38, CTGF, KCNJ2, SMAD3, JAM2, OLR1, ABCA1, ROCK2, PKN2, CYFIP2, GDF5, CAV1, POSTN, ITGAV, ITGB5, TNFRSF11B, GNE, PODXL, THBS1, FERMT2, ANXA2, STAT3, TXNRD1, RCAN1, STC1, PTPN11, RND3, ADAM12, CD9, JAM3, NDUFA6, THBS2, IGFBP3, SRXN1, PDLIM1, CYR61, RAP2A, BDNF, ACTA2, PVRL3, HIF1A, NGF, VCAN, HMOX1, MICB, GFRA1, PDCL, SIPA1, DAB2, TULP4, CTNNB1, STAT1, MMP1, OXTR, ITGB1, PPARG, TIMP3, CCKAR, KCNN2, EPAS1, TNC, CDH6, GREM1, AXL, F3, NUDT15, KITLG, GCS1, CD82, ADAM9, IL11                                                                                                                                                                                                                                                                                                                                                                                                                                                                                                                                                       |
| Cellular Assembly and Organization         | 1.92E-03    | 6.68E-05    | STC1, ADM, GNB1, BDNF, CXCL12, ITGA6, RDX, ANXA2, ABCA1, RASD1                                                                                                                                                                                                  | KIF23, DLGAP5, CTGF, KCNJ2, SMAD3, NCAPG, CCNB2, KRAS, ROCK2, GNB1, EZR, CAV1, MYO10, DSP, THBS1, RDX, STAT3, EIF3E, ROR1, NDN, NPC1, PTPN11, CD9, RND3, CYR61, RAP1B, AKAP12, TPM1, BDNF, PICALM, RECK, PVRL3, NGF, DMD, INPP5A, VCAN, CCNA2, GFRA1, TOP2A, DAB2, NLF, MARCKS, FGF7, RAD21, PPARG, ITGB1, NUSAP1, CCKAR, CCNB1, TNC, AXL, CDC2, KITLG, PMP22, PRKCI, SERPINH1, CD82, KIF18A                                                                                                                                                                                                                                                                                                                                                                                                                                                                                                                                                                                                                                                         |
| Cellular Compromise                        | 6.32E-03    | 7.66E-05    | HMOX1, BDNF, CXCL12, RDX, ABCA1                                                                                                                                                                                                                                 | ITGB1, CCNB1, THBS1, PDCL, ACTA2, ITGAV, CDC2                                                                                                                                                                                                                                                                                                                                                                                                                                                                                                                                                                                                                                                                                                                                                                                                                                                                                                                                                                                                        |
| Cellular Development                       | 1.39E-03    | 8.67E-09    | AKAP12, YWHAG, BDNF, OSTM1, ITGA6, CDK6, GREM1, ANXA2, ID3, STC1, GDF5, SPRY2, CXCL12, NEUROG1, CBFB, CYR61, MMP1, IL11                                                                                                                                         | CTGF, KCNJ2, RAB2A, KRAS, PPP1R14B, ODC1, PKN2, GDF5, EZR, IFITM2, CAV1, CBFB, HOOK1, ITGB5, BST1, YWHAG, ANXA2, STAT3, NDN, AREG, MAP3K12, CD9, SNAI2, BHLHB2, ZAK, THBS2, FOXF1, CYR61, AKAP12, BDNF, DMD, EIF4E, VCAN, ID1, TBX2, DAB2, UBE2D3, CTNNB1, FGF7, MMP1, ITGB1, TNC, SUZ12, GREM1, AXL, KITLG, CAP2, NEUROG1, CD82, ICMT, DLGAP5, AKR1C3, SMAD3, OLR1, ROCK2, VASH1, POSTN, ITGAV, DSP, TNFRSF11B, TUBB3, FST, THBS1, OSTM1, RDX, CDK6, RCAN1, STC1, IRF7, PTPN11, RND3, IGFBP3, RAP2A, PEBP1, TPM1, ID2, PICALM, KIAA0101, HIF1A, NGF, TCF12, IGLL1, CIAPIN1, HMOX1, GMNN, GFRA1, SIPA1, MARCKS, STAT1, MAGEH1, PPARG, EPAS1, IVNS1ABP, PMP22, PRKCI, RAS2, SATB1, DKK1, IL11, WNT5A                                                                                                                                                                                                                                                                                                                                                  |
| Cellular Function and Maintenance          | 5.07E-03    | 4.82E-04    | AKAP12, BICD2, BDNF, CXCL12, ACTR10                                                                                                                                                                                                                             | PICALM, ITGAV, CAV1, ITGB5                                                                                                                                                                                                                                                                                                                                                                                                                                                                                                                                                                                                                                                                                                                                                                                                                                                                                                                                                                                                                           |
| Cellular Growth and Proliferation          | 8.02E-04    | 1.17E-12    | AKAP12, ADM, HTR2B, BTG3, BDNF, C9ORF78, GNB1, HMOX1, GDF5, AKT3, IFITM1, CBFB, OXTR, ADAMTS1, WEE1, ITGA6, CDK6, GREM1, ANXA2, ID3, RASD1, TXNRD1, ISG15, IVNS1ABP, STC1, EMP1, ADAM12, NTSE, CXCL12, SPRY2, NEUROG1, DHFR, RNF14, BAT2D1, CYR61, STEAP3, IL11 | PLD2, CTGF, HTR2B, RAB2A, PLK3, HMMR, KRAS, ODC1, CCNG1, GNB1, GDF5, EZR, LEPRE1, CAV1, SERPINB7, CBFB, ITGB5, PDIA5, RRM2, ANLN, ANXA2, STAT3, NDN, AREG, CDC73, CD9, BHLHB2, SNAI2, THBS2, DHFR, FOXF1, MEST, CYR61, STEAP3, MAB21L1, ADM, RAP1B, AKAP12, BTG3, BDNF, DMD, ATP6AP1, EIF4E, VCAN, ID1, BBC3, DAB2, TBX2, IFITM1, UBE2D3, CTNNB1, FGF7, MMP1, CITED2, OXTR, ITGB1, CCKAR, PDZK1, CCNB1, TNC, SUZ12, GREM1, OAS3, AXL, CDC2, ISG15, BUB1, KITLG, PLA2G4A, SERPINH1, BMF, PEA15, NEUROG1, CD82, BTRC, RNF14, KIF23, WFDC1, DLGAP5, ICMT, AKR1C3, SMAD3, UBE2V2, ROCK2, POSTN, ITGAV, UBE2E3, DSP, SCN5A, TNFRSF11B, TUBB3, PAPP, FST, ADAMTS1, THBS1, WEE1, CDK6, MYOF, TXNRD1, TPX2, RCAN1, RASD1, PDLIM4, SFRS3, STC1, ATP5B, ADAM12, PTPN11, IGFBP3, LRDD, HTRA1, FADS1, PMEPA1, DCBLD2, PEBP1, TPM1, DDX21, ID2, FRZB, EPB41L3, KIAA0101, RECK, C9ORF78, TAF7, HIF1A, NGF, TCF12, IGLL1, CCNA2, HMOX1, GFRA1, SIPA1, ENPP2, STAT1, PPARG, TIMP3, EPAS1, MX1, FDXR, CEDDIN1, IVNS1ABP, FMPD1, DMDP2, PRKCI, NTFE, DKK1, WNT5A, IL11 |
| Cellular Movement                          | 4.08E-04    | 9.23E-11    | ADM, BDNF, ITGA6, GREM1, ANXA2, ID3, GNB1, STC1, GDF5, ADAM12, CXCL12, SPRY2, SEMA6D, AKT3, NEUROG1, CBFB, CYR61, MMP1, IL11                                                                                                                                    | KIF23, PLD2, CTGF, HMMR, SMAD3, CCNB2, OLR1, ODC1, GNB1, MYLK, ROCK2, VASH1, NARS, GDF5, EZR, ITGAV, POSTN, CAV1, CBFB, MYO10, ITGB5, TNFRSF11B, PODXL, FST, THBS1, FERMT2, ANLN, ANXA2, EIF3E, STAT3, NDN, AREG, STC1, NPC1, MAP3K12, SDCBP, RND3, PTPN11, ADAM12, CD9, JAM3, SNAI2, SEMA6D, THBS2, IGFBP3, CYR61, RAP2A, PEBP1, ADM, SULF1, TPM1, ID2, PICALM, BDNF, RECK, HIF1A, NGF, VCAN, PDCD4, ID1, GFRA1, TOP2A, ENPP2, MARCKS, STAT1, CTNNB1, FGF7, MMP1, ITGB1, PPARG, TIMP3, NUSAP1, CCKAR, CCNB1, TNC, GREM1, AXL, F3, CDC2, SERPINE2, IVNS1ABP, KITLG, PLA2G4A, PMP22, RAS2, PRKCI, CCR4, ASAP2, PROC, NFUROG1, CDR2, SFMAR3, ADAM9, WNT5A, IL11                                                                                                                                                                                                                                                                                                                                                                                        |
| Cellular Response to Therapeutics          | 6.32E-03    | ns          | CYR61                                                                                                                                                                                                                                                           |                                                                                                                                                                                                                                                                                                                                                                                                                                                                                                                                                                                                                                                                                                                                                                                                                                                                                                                                                                                                                                                      |
| DNA Replication, Recombination, and Repair | 6.32E-03    | 7.68E-04    | NT5E, CXCL12                                                                                                                                                                                                                                                    | RAP1B, ADM, PEBP1, DLGAP5, NCAPG, CCNB2, NGF, ROCK2, CCNA2, ID1, TOP2A, CAV1, FGF7, RAD21, ITGB1, PPARG, NUSAP1, TNC, CCNB1, CDK6, GREM1, EIF3E, AREG, KITLG, RAS2, PTPN11, THBS2, IGFBP3, FEEMP1, CYR61, KIF18A                                                                                                                                                                                                                                                                                                                                                                                                                                                                                                                                                                                                                                                                                                                                                                                                                                     |
| Drug Metabolism                            | 6.32E-03    | ns          | RDX, DHFR, ABCA1                                                                                                                                                                                                                                                |                                                                                                                                                                                                                                                                                                                                                                                                                                                                                                                                                                                                                                                                                                                                                                                                                                                                                                                                                                                                                                                      |
| Energy Production                          | 6.32E-03    | ns          | STC1                                                                                                                                                                                                                                                            |                                                                                                                                                                                                                                                                                                                                                                                                                                                                                                                                                                                                                                                                                                                                                                                                                                                                                                                                                                                                                                                      |
| Gene Expression                            | 1.26E-02    | 2.91E-04    | ITGA6, CBFB                                                                                                                                                                                                                                                     | HTR2B, SMAD3, KRAS, ATP8B1, PKN2, ITGAV, CAV1, CBFB, TEAD2, VPS4B, FST, YWHAG, IRF9, STAT3, NDN, RCAN1, BACH1, IRF7, PTPN11, SNAI2, BHLHB2, PDLIM1, SMURF2, SNX6, FOXF1, RAP2A, AKAP12, PEBP1, DEK, ID2, BDNF, TAF7, HIF1A, NGF, ZBTB38, PDCD4, TCF12, CCNA2, ID1, UBE2V1, TOP2A, DAB2, TBX2, STAT1, CTNNB1, FGF7, CITED2, PPARG, ITGB1, TRIP13, JAZF1, CCNB1, EPAS1, SUZ12, CDC2, SERPINE2, IVNS1ABP, HTATSF1, PRKCI, SATB1, PEA15, IGF2BP2, NEUROG1, LBH, DKK1, RNF14, TFB1M, HLF, IL11                                                                                                                                                                                                                                                                                                                                                                                                                                                                                                                                                            |
| Lipid Metabolism                           | 1.73E-03    | 1.53E-03    | ADM, RDH11, CXCL12, ABCA1                                                                                                                                                                                                                                       | KITLG, ROCK2, PLA2G4A, NPC1, CD9, CAV1, ENPP2, CD82, HIF1A, STAT3, NGF, ABCA1                                                                                                                                                                                                                                                                                                                                                                                                                                                                                                                                                                                                                                                                                                                                                                                                                                                                                                                                                                        |
| Molecular Transport                        | 1.73E-03    | 3.35E-06    | ADM, RDH11, BDNF, RDX, SLC39A14, DIO2, ABCA1, TXNRD1, STC1, NT5E, SLC14A1, CXCL12, NEDD4L, STEAP3                                                                                                                                                               | ITGB1, STAT3, HIF1A, NGF, ABCA1, ROCK2, KITLG, NPC1, PLA2G4A, SATB1, IGFBP3, CAV1, ITGAV, ENPP2                                                                                                                                                                                                                                                                                                                                                                                                                                                                                                                                                                                                                                                                                                                                                                                                                                                                                                                                                      |
| Nucleic Acid Metabolism                    | 1.38E-03    | ns          | GNB1, ADM, HMOX1, NT5E, CXCL12, UAP1, RASD1, ABCA1, OXTR                                                                                                                                                                                                        |                                                                                                                                                                                                                                                                                                                                                                                                                                                                                                                                                                                                                                                                                                                                                                                                                                                                                                                                                                                                                                                      |
| Post-Translational Modification            | 1.26E-02    | 6.87E-05    | ADM, CXCL12, GREM1, ANXA2                                                                                                                                                                                                                                       | ADM, ICMT, ZDHHC2, PLD2, EPB41L3, PTPLA, UBE2V2, NGF, ODC1, ABCA1, GALNAC4S-6ST, MYLK, PDCL, UBE2V1, ITGAV, FBXO11, UBE2D3, RNF144B, STAT1, FGF7, MMP1, ITGB1, PDIA5, MOBKL1A, TBCA, SUZ12, THBS1, ATG3, CDK6, GREM1, SEP15, CDC2, ISG15, KITLG, PPP2CB, MAP3K12, WHSC1L1, PTPN11, CD9, SATB1, GCS1, IGFBP3, ATXN10                                                                                                                                                                                                                                                                                                                                                                                                                                                                                                                                                                                                                                                                                                                                  |
| Protein Folding                            | 1.26E-02    | ns          | TBCA                                                                                                                                                                                                                                                            |                                                                                                                                                                                                                                                                                                                                                                                                                                                                                                                                                                                                                                                                                                                                                                                                                                                                                                                                                                                                                                                      |
| Protein Trafficking                        | ns          | 3.35E-06    |                                                                                                                                                                                                                                                                 | ITGB1, SATB1, IGFBP3, ITGAV                                                                                                                                                                                                                                                                                                                                                                                                                                                                                                                                                                                                                                                                                                                                                                                                                                                                                                                                                                                                                          |

|                                |          |          |                                                                                                |                                                                                           |
|--------------------------------|----------|----------|------------------------------------------------------------------------------------------------|-------------------------------------------------------------------------------------------|
| Small Molecule Biochemistry    | 1.38E-03 | 4.82E-04 | ADM, RDH11, RDX, ANXA2, DIO2, ABCA1, RASD1, GFPT2, GNB1, HMOX1, NT5E, CXCL12, UAP1, DHFR, OXTR | GLS, STAT3, HIF1A, NGF, ABCA1, GFPT2, ROCK2, KITLG, NPC1, PLA2G4A, CD9, CAV1, CD82, ENPP2 |
| Vitamin and Mineral Metabolism | 6.32E-03 | ns       | RDH11, DHFR, DIO2, ABCA1                                                                       |                                                                                           |
