# Supplementary material for: Identification of Keratinocyte Growth Factor as a Target of microRNA-155 in Lung Fibroblasts: Implication in Epithelial-Mesenchymal Interactions
Source: PubMed Central journal article supplement (PMC2726943; doi:10.1371/journal.pone.0006718), 2009-08-24
Supplement: pone.0006718.s005.pdf [file pone.0006718.s005.pdf]

| N° | Name    | ID     | UNIGENE_ID | ACCESSION_NUMBER                                            | log2 Ratio |       | adj.P.Val |          |
|----|---------|--------|------------|-------------------------------------------------------------|------------|-------|-----------|----------|
|    |         |        |            |                                                             | 24h        | 48h   | 24h       | 48h      |
| 1  | ACTR10  | 34236  | Hs.509451  | NM_018477                                                   | -1.41      | -2.01 | 3.66E-06  | 3.89E-07 |
| 2  | ACVR1   | 90666  | Hs.470316  | NM_001105                                                   | -0.04      | -0.81 | 8.31E-01  | 1.73E-04 |
| 3  | ADAMTS1 | 16014  | Hs.534115  | NM_006988                                                   | -1.15      | -2.26 | 1.01E-05  | 5.42E-07 |
| 4  | ADRB2   | 83352  | Hs.591251  | NM_000024                                                   | -0.83      | -0.61 | 6.86E-05  | 1.33E-04 |
| 5  | ANKMY2  | 103133 | Hs.157378  | NM_020319                                                   | -0.86      | -1.15 | 3.77E-04  | 5.00E-05 |
| 6  | ANTXR2  | 49597  | Hs.162963  | NM_058172                                                   | -1.30      | -1.54 | 1.49E-05  | 3.82E-06 |
| 7  | ANXA2   | 7407   | Hs.511605  | NM_001002857;NM_004039;NM_001002858;NR_001446               | -0.58      | -1.24 | 1.97E-01  | 7.41E-03 |
|    | ANXA2   | 132294 | Hs.511605  | NM_001002857;NM_004039;NM_001002858;NR_001446               | -1.18      | -2.67 | 2.74E-03  | 1.53E-05 |
| 8  | ANXA3   | 8955   | Hs.480042  | NM_005139                                                   | -1.18      | -2.94 | 6.54E-03  | 2.48E-05 |
| 9  | AP1B1   | 104373 | Hs.368794  | NM_001127;NM_145730                                         | -0.69      | -0.43 | 3.38E-05  | 1.46E-04 |
| 10 | ARL2BP  | 21287  | Hs.513631  | NM_012106                                                   | -1.94      | -2.61 | 1.36E-04  | 9.74E-06 |
| 11 | ARL6IP5 | 131104 | Hs.518060  | NM_006407                                                   | -0.01      | -0.81 | 9.39E-01  | 3.98E-05 |
| 12 | ARPC3   | 9688   | Hs.524741  | NM_005719                                                   | -0.65      | -0.99 | 3.58E-05  | 1.52E-06 |
| 13 | ASPH    | 105511 | Hs.332422  | NM_032468;NM_032466                                         | -0.88      | -1.73 | 7.12E-05  | 1.52E-06 |
|    | ASPH    | 105515 | Hs.332422  | NM_032468;NM_032466                                         | -0.55      | -1.66 | 6.56E-03  | 9.31E-06 |
| 14 | ATG3    | 39274  | Hs.477126  | NM_022488                                                   | -0.80      | -1.19 | 1.97E-04  | 2.38E-05 |
| 15 | ATP10D  | 36649  | Hs.437241  | NM_020453                                                   | -1.44      | -1.54 | 1.13E-04  | 4.53E-05 |
| 16 | ATP6V1D | 25500  | Hs.272630  | NM_015994                                                   | -0.83      | -0.67 | 7.44E-05  | 1.93E-04 |
| 17 | ATXN10  | 21696  | Hs.475125  | NM_013236                                                   | -1.11      | -1.08 | 3.07E-04  | 1.80E-04 |
| 18 | BACH1   | 90782  | Hs.154276  | NM_001186;NM_206866                                         | -0.85      | -1.12 | 2.78E-04  | 4.75E-05 |
| 19 | BDKRB2  | 90051  | Hs.525572  | NM_000623                                                   | -0.96      | -0.55 | 1.01E-03  | 1.30E-02 |
| 20 | BDNF    | 91429  | Hs.502182  | NM_170734;NM_001709;NM_170731;NM_170733;NM_170735;NM_170732 | -1.15      | -1.72 | 8.59E-03  | 4.55E-04 |
| 21 | BIRC3   | 87599  | Hs.127799  | NM_182962;NM_001165                                         | -0.56      | -0.35 | 5.82E-04  | 4.31E-03 |
| 22 | BTBD1   | 45748  | Hs.459149  | NM_025238;NM_001011885                                      | 0.13       | -0.59 | 1.49E-01  | 7.26E-05 |
| 23 | BTBD3   | 26343  | Hs.244590  | NM_181443;NM_014962                                         | -0.91      | -1.22 | 3.47E-05  | 4.35E-06 |
| 24 | BTBD7   | 30580  | Hs.525549  | NM_018167                                                   | -0.33      | -0.52 | 1.71E-03  | 9.53E-05 |
| 25 | CALU    | 89284  | Hs.643549  | NM_001219                                                   | -0.95      | -1.21 | 3.66E-04  | 3.50E-05 |
| 26 | CAMTA1  | 77481  | Hs.397705  | AY037153                                                    | -0.55      | -1.17 | 3.87E-03  | 5.35E-05 |
| 27 | CARHSP1 | 22307  | Hs.632184  | NM_014316;NM_001042476                                      | -0.22      | -0.65 | 1.43E-02  | 2.94E-05 |
| 28 | CASP6   | 168755 | Hs.389452  | NM_032992;NM_001226                                         | -0.25      | -0.79 | 2.15E-02  | 6.75E-05 |
| 29 | CASP9   | 87679  | Hs.329502  | NM_032996;NM_001229                                         | -0.55      | -0.51 | 1.16E-04  | 1.91E-04 |
| 30 | CBFB    | 94541  | Hs.460988  | NM_022845;NM_001755                                         | -1.57      | -1.74 | 1.03E-03  | 3.46E-04 |
| 31 | CCDC41  | 25679  | Hs.279209  | NM_001042399;NM_016122                                      | -0.48      | -0.51 | 3.42E-04  | 9.70E-05 |
| 32 | CCT2    | 111218 | Hs.189772  | NM_006431                                                   | -0.07      | -0.87 | 7.11E-01  | 2.14E-04 |
| 33 | CDC73   | 38344  | Hs.576497  | NM_024529                                                   | -0.66      | -1.03 | 5.01E-03  | 2.50E-04 |
| 34 | CDCA7   | 46388  | Hs.470654  | NM_031942;NM_145810                                         | -0.92      | -0.54 | 2.16E-05  | 1.33E-04 |
| 35 | CDV3    | 29683  | Hs.642726  | NM_017548                                                   | -1.24      | -2.00 | 5.40E-03  | 2.37E-04 |
| 36 | CEP63   | 42494  | Hs.443301  | NM_025180;NM_001042384;NM_001042383;NM_001042400            | -0.22      | -0.61 | 2.94E-02  | 1.45E-04 |

|    |         |        |           |                                                                            |       |       |          |          |
|----|---------|--------|-----------|----------------------------------------------------------------------------|-------|-------|----------|----------|
| 37 | CEP70   | 39884  | Hs.531962 | NM_024491                                                                  | -0.51 | -0.62 | 3.30E-03 | 5.88E-04 |
| 38 | CFL2    | 139860 | Hs.180141 | NM_138638;NM_021914                                                        | -0.79 | -1.83 | 1.20E-02 | 9.10E-05 |
| 39 | CHCHD7  | 39808  | Hs.436913 | NM_001011671;NM_001011669;NM_001011670;NM_001011668;NM_024300;NM_001011667 | -0.28 | -0.74 | 5.12E-02 | 2.58E-04 |
| 40 | CHSY1   | 23060  | Hs.110488 | NM_014918                                                                  | -1.21 | -1.40 | 8.04E-06 | 2.68E-06 |
| 41 | CIAPIN1 | 163555 | Hs.4900   | NM_020313                                                                  | -0.64 | -1.08 | 3.28E-05 | 2.74E-06 |
| 42 | CLCN3   | 93105  | Hs.481186 | NM_173872;NM_001829                                                        | -0.70 | -0.96 | 2.74E-03 | 1.98E-04 |
| 43 | CNIH    | 12884  | Hs.294603 | NM_005776;NM_001009551                                                     | -0.39 | -1.77 | 6.72E-02 | 4.74E-05 |
| 44 | COPS3   | 97088  | Hs.6076   | NM_003653                                                                  | -0.53 | -0.84 | 2.12E-03 | 6.91E-05 |
| 45 | CPD     | 92443  | Hs.446079 | NM_001304                                                                  | -1.06 | -2.05 | 1.08E-05 | 5.42E-07 |
| 46 | CREG1   | 7220   | Hs.5710   | NM_003851                                                                  | -0.15 | -0.98 | 1.16E-01 | 1.23E-05 |
| 47 | CSNK1A1 | 91649  | Hs.529862 | NM_001025105;NM_001892                                                     | -0.98 | -1.29 | 1.53E-05 | 1.52E-06 |
| 48 | CUGBP2  | 17048  | Hs.309288 | NM_001025077;NM_001083591;NM_001025076;NM_006561                           | -0.60 | -1.17 | 1.33E-02 | 2.35E-04 |
| 49 | CYFIP1  | 22658  | Hs.26704  | NM_014608;NM_001033028                                                     | -0.72 | -1.00 | 1.85E-03 | 2.13E-04 |
| 50 | CYR61   | 94295  | Hs.8867   | NM_001554                                                                  | -1.38 | -2.81 | 9.13E-03 | 9.18E-05 |
| 51 | DCUN1D3 | 155818 | Hs.101007 | NM_173475                                                                  | -0.69 | -0.49 | 3.12E-04 | 4.96E-04 |
| 52 | DCUN1D4 | 84291  | Hs.221407 | NM_001040402;NM_015115                                                     | -1.05 | -1.23 | 7.66E-06 | 2.24E-06 |
| 53 | DDEF2   | 5660   | Hs.555902 | NM_003887                                                                  | -0.95 | -1.30 | 3.31E-04 | 3.03E-05 |
| 54 | DEK     | 99927  | Hs.484813 | NM_003472                                                                  | -1.11 | -1.57 | 3.95E-04 | 5.39E-05 |
| 55 | DNAJC15 | 21703  | Hs.438830 | NM_013238                                                                  | -0.30 | -0.79 | 5.95E-03 | 1.45E-05 |
| 56 | DNAJC19 | 58938  | Hs.230601 | NM_145261;NM_201259;NM_201261;NM_201260                                    | -1.03 | -1.43 | 3.69E-04 | 3.61E-05 |
|    | DNAJC19 | 58939  | Hs.230601 | NM_145261;NM_201259                                                        | -0.96 | -1.39 | 1.27E-04 | 7.05E-06 |
| 57 | DNTTIP1 | 50999  | Hs.472852 | NM_052951                                                                  | -0.34 | -0.95 | 1.54E-03 | 9.42E-06 |
| 58 | DPY19L1 | 211    | Hs.408623 | AB020684;NM_015283                                                         | -2.55 | -2.66 | 3.46E-05 | 1.55E-05 |
| 59 | DUSP14  | 16060  | Hs.91448  | NM_007026                                                                  | -0.61 | -1.31 | 1.46E-03 | 2.06E-05 |
| 60 | DYRK3   | 100025 | Hs.164267 | NM_001004023;NM_003582                                                     | -0.75 | -0.54 | 8.21E-04 | 3.33E-03 |
| 61 | ECHDC1  | 34245  | Hs.486410 | NM_001105545;NM_001105544;NM_001002030;NM_018479                           | 0.00  | -0.57 | 9.96E-01 | 4.05E-04 |
| 62 | ELF4    | 94119  | Hs.271940 | NM_001421                                                                  | -0.55 | -0.35 | 7.07E-04 | 6.58E-03 |
| 63 | ELL2    | 21259  | Hs.592742 | NM_012081                                                                  | -1.38 | -2.83 | 7.07E-04 | 9.31E-06 |
| 64 | EPAS1   | 100922 | Hs.468410 | NM_001430;AA680300                                                         | -0.66 | -1.27 | 2.63E-02 | 6.28E-04 |
| 65 | FAM104A | 50303  | Hs.103555 | NM_001098832;NM_032837                                                     | -0.24 | -0.55 | 9.92E-03 | 1.62E-04 |
| 66 | FAM18B  | 116411 | Hs.87295  | NM_016078                                                                  | -0.08 | -0.62 | 5.48E-01 | 3.13E-04 |
| 67 | FAM29A  | 28153  | Hs.533468 | NM_017645                                                                  | -0.69 | -0.46 | 3.49E-04 | 1.46E-03 |
| 68 | FAM3C   | 116003 | Hs.434053 | NM_001040020;NM_014888                                                     | -0.45 | -1.23 | 5.04E-02 | 1.76E-04 |
| 69 | FBXO11  | 169922 | Hs.352677 | NM_025133                                                                  | -0.93 | -1.05 | 2.70E-04 | 6.55E-05 |
| 70 | FBXO30  | 44964  | Hs.421095 | NM_032145                                                                  | -0.17 | -0.57 | 9.72E-02 | 2.05E-04 |
| 71 | FEM1C   | 33240  | Hs.47367  | NM_020177                                                                  | -0.36 | -0.52 | 7.08E-03 | 7.09E-04 |
| 72 | FEZ2    | 8900   | Hs.258563 | NM_005102;NM_001042548                                                     | -1.60 | -2.09 | 4.70E-06 | 6.97E-07 |
| 73 | FGF7    | 129551 | Hs.567268 | NM_002009                                                                  | -0.78 | -1.33 | 2.71E-03 | 9.21E-05 |
|    | FGF7    | 172697 | Hs.567268 | NM_002009;AK054997                                                         | -1.12 | -1.55 | 6.86E-04 | 3.12E-05 |

|     |          |        |           |                                               |       |       |          |          |
|-----|----------|--------|-----------|-----------------------------------------------|-------|-------|----------|----------|
| 74  | FLJ13611 | 45386  | Hs.591760 | NM_024941;NM_001093756;NM_001093755           | -0.69 | -0.65 | 3.05E-04 | 1.41E-04 |
| 75  | FLJ20147 | 29852  |           | NM_017687                                     | -1.19 | -0.67 | 5.23E-06 | 1.83E-05 |
| 76  | FNDC3B   | 37840  | Hs.159430 | NM_022763                                     | -0.35 | -0.87 | 6.68E-03 | 4.69E-05 |
| 77  | FRYL     | 74114  |           | NM_015030                                     | -0.45 | -1.08 | 3.54E-03 | 3.30E-05 |
| 78  | FYTTD1   | 48209  | Hs.277533 | NM_001011537;NM_032288                        | -1.15 | -1.37 | 2.16E-05 | 5.54E-06 |
|     | FYTTD1   | 48212  | Hs.277533 | NM_001011537;NM_032288                        | -0.66 | -1.29 | 3.54E-02 | 6.43E-04 |
| 79  | GALT     | 107581 | Hs.522090 | NM_147131;NM_000155;NM_147132                 | -0.77 | -0.98 | 2.65E-05 | 8.13E-06 |
| 80  | GBA2     | 36858  | Hs.443134 | NM_020944                                     | -0.61 | -0.45 | 1.86E-03 | 5.59E-03 |
| 81  | GFRA1    | 10643  | Hs.591913 | NM_005264;NM_145793                           | -0.70 | -1.60 | 8.19E-03 | 8.72E-05 |
| 82  | GHITM    | 140070 | Hs.352656 | NM_014394                                     | 0.01  | -0.86 | 9.60E-01 | 2.59E-04 |
| 83  | GLT25D1  | 41747  | Hs.418795 | NM_024656                                     | -0.22 | -0.91 | 4.97E-02 | 3.62E-05 |
| 84  | GMNN     | 26968  | Hs.234896 | NM_015895                                     | -1.80 | -1.84 | 3.27E-05 | 1.82E-05 |
| 85  | GOLT1B   | 25610  | Hs.62275  | NM_016072                                     | -0.84 | -0.87 | 8.76E-05 | 5.21E-05 |
| 86  | GOT1     | 93452  | Hs.500756 | NM_002079                                     | -0.70 | -1.19 | 2.98E-05 | 1.06E-06 |
| 87  | GPR126   | 72392  | Hs.318894 | NM_001032394;NM_198569;NM_001032395;NM_020455 | -1.43 | -2.02 | 3.66E-04 | 2.65E-05 |
| 88  | GPSM2    | 21768  | Hs.584901 | NM_013296                                     | -0.88 | -0.60 | 5.38E-04 | 3.22E-03 |
| 89  | GRPEL1   | 42507  | Hs.443723 | NM_025196                                     | -0.51 | -0.84 | 1.37E-03 | 3.50E-05 |
| 90  | GYG1     | 4403   | Hs.477892 | NM_004130                                     | -1.09 | -1.32 | 2.76E-05 | 3.77E-06 |
| 91  | H3F3A    | 91945  | Hs.546259 | NM_002107                                     | -1.73 | -2.31 | 3.64E-04 | 2.61E-05 |
| 92  | HADHB    | 89454  | Hs.534639 | NM_000183                                     | -0.30 | -0.63 | 8.63E-03 | 8.79E-05 |
| 93  | HBP1     | 19881  | Hs.162032 | NM_012257                                     | -0.64 | -0.26 | 1.71E-03 | 8.34E-02 |
| 94  | HDHD2    | 44923  | Hs.465041 | NM_032124                                     | -1.50 | -2.01 | 3.66E-06 | 2.72E-07 |
| 95  | HELZ     | 26237  | Hs.631739 | NM_014877                                     | -0.21 | -0.62 | 5.55E-02 | 1.98E-04 |
| 96  | HIF1A    | 91228  | Hs.509554 | NM_001530                                     | -0.05 | -1.02 | 8.81E-01 | 6.88E-04 |
|     | HIF1A    | 174919 | Hs.509554 | NM_001530;NM_181054                           | 0.07  | -0.74 | 8.54E-01 | 1.21E-02 |
| 97  | HMGB3    | 12326  | Hs.19114  | NM_005342                                     | -0.69 | -0.64 | 1.56E-03 | 1.14E-03 |
| 98  | HNRPA3   | 164571 | Hs.516539 | NM_005758;NM_194247                           | -1.81 | -2.21 | 7.61E-05 | 1.09E-05 |
| 99  | HSD17B12 | 24071  | Hs.132513 | NM_016142                                     | -1.29 | -2.06 | 7.60E-04 | 4.61E-05 |
| 100 | HTATSF1  | 115350 | Hs.204475 | NM_014500                                     | 0.14  | -1.05 | 4.60E-01 | 2.09E-04 |
| 101 | HTR2B    | 88845  | Hs.421649 | NM_000867                                     | -1.57 | -3.45 | 4.83E-04 | 3.96E-06 |
| 102 | IER5     | 137631 | Hs.15725  | NM_016545                                     | -0.73 | -0.50 | 1.58E-05 | 9.64E-05 |
| 103 | IFNAR1   | 130256 | Hs.529400 | NM_000629                                     | 0.03  | -0.53 | 8.72E-01 | 6.46E-04 |
| 104 | IGFBP5   | 81532  | Hs.369982 | BC018427;NM_000599                            | -0.13 | -0.89 | 5.35E-01 | 5.18E-04 |
| 105 | INPP5A   | 12584  | Hs.523360 | NM_005539                                     | -1.19 | -1.30 | 1.07E-05 | 1.93E-06 |
| 106 | KCNN2    | 173651 | Hs.98280  | NM_021614;NM_170775                           | -1.40 | -2.51 | 9.41E-06 | 5.42E-07 |
| 107 | KCTD3    | 24048  | Hs.335139 | NM_016121                                     | -0.93 | -1.32 | 8.04E-06 | 9.96E-07 |
| 108 | KCTD9    | 31421  | Hs.72071  | NM_017634                                     | -0.52 | -1.18 | 4.99E-02 | 5.01E-04 |
| 109 | KITLG    | 162205 | Hs.1048   | AK055903;NM_003994;NM_000899                  | -0.56 | -1.61 | 1.91E-02 | 6.39E-05 |
| 110 | KRCC1    | 29475  | Hs.469254 | NM_016618                                     | -0.43 | -0.70 | 1.68E-03 | 3.61E-05 |
| 111 | LDLRAP1  | 23624  | Hs.590911 | NM_015627                                     | -0.41 | -0.59 | 7.44E-04 | 5.96E-05 |

|     |           |        |           |                                         |       |       |          |          |
|-----|-----------|--------|-----------|-----------------------------------------|-------|-------|----------|----------|
| 112 | LHFPL2    | 82990  | Hs.79299  | NM_005779                               | -0.54 | -0.67 | 1.21E-03 | 2.16E-04 |
| 113 | LKAP      | 36188  | Hs.173524 | NM_019081;NM_014647                     | -0.69 | -0.47 | 2.27E-04 | 1.12E-03 |
| 114 | LOC400657 | 160843 | Hs.61508  | NM_001008234                            | -0.43 | -0.57 | 1.38E-03 | 1.87E-04 |
| 115 | LOC644246 | 81628  | Hs.463231 | BC020847                                | -0.77 | -0.84 | 3.21E-05 | 1.86E-05 |
| 116 | LPGAT1    | 26227  | Hs.591421 | NM_014873                               | -0.91 | -1.33 | 3.27E-05 | 2.41E-06 |
| 117 | LRCH2     | 35301  | Hs.65366  | NM_020871                               | -0.57 | -0.60 | 1.91E-03 | 7.62E-04 |
| 118 | LRRRC17   | 119965 | Hs.567412 | NM_005824;NM_001031692                  | 0.14  | -0.60 | 5.06E-02 | 1.30E-05 |
| 119 | LRRRC42   | 47910  | Hs.40094  | NM_052940                               | -0.66 | -0.94 | 1.23E-03 | 6.92E-05 |
|     | LRRRC42   | 47914  | Hs.40094  | NM_052940                               | -0.29 | -0.88 | 2.14E-01 | 1.76E-03 |
| 120 | LRRRC59   | 32621  | Hs.370927 | NM_018509                               | -0.96 | -0.98 | 6.91E-04 | 2.12E-04 |
| 121 | LRRTM4    | 137992 | Hs.285782 | NM_024993                               | -0.37 | -0.69 | 8.97E-03 | 2.77E-04 |
| 122 | LY6K      | 28041  | Hs.69517  | NM_017527                               | -1.43 | -1.56 | 9.63E-06 | 2.74E-06 |
| 123 | LYCAT     | 162784 | Hs.468048 | NM_001002257;NM_182551                  | -0.65 | -0.80 | 1.52E-04 | 3.50E-05 |
| 124 | MAP3K7IP2 | 163253 | Hs.269775 | NM_145342;NM_015093                     | -1.26 | -1.34 | 1.52E-04 | 1.81E-04 |
| 125 | MARCH6    | 131379 | Hs.432862 | NM_005885                               | -0.18 | -0.51 | 6.60E-02 | 5.69E-04 |
| 126 | MARVELD2  | 55574  | Hs.444195 | NM_144724                               | -0.48 | -0.82 | 7.43E-05 | 8.39E-06 |
| 127 | MCPH1     | 38457  | Hs.490892 | NM_024596                               | -0.39 | -0.68 | 2.63E-03 | 1.08E-04 |
| 128 | MEGF6     | 149280 | Hs.593645 | AF086414;NM_001409                      | -0.87 | -0.73 | 6.14E-04 | 5.71E-04 |
|     |           |        | Hs.56186  |                                         |       |       |          |          |
| 129 | MEIS1     | 95402  | Hs.526754 | NM_002398                               | -0.99 | -0.76 | 3.64E-04 | 1.02E-03 |
| 130 | MEST      | 93841  | Hs.270978 | NM_177524;NM_177525;NM_002402           | -0.57 | -2.23 | 6.97E-05 | 1.48E-07 |
| 131 | MGC16169  | 47509  | Hs.292986 | NM_033115                               | -1.10 | -0.82 | 4.09E-05 | 3.50E-05 |
| 132 | MGST1     | 178418 | Hs.389700 | NM_145764;NM_145791;NM_020300;NM_145792 | -0.04 | -0.73 | 8.66E-01 | 3.36E-04 |
| 133 | MMD       | 19979  | Hs.463483 | NM_012329                               | -1.26 | -1.82 | 6.20E-03 | 3.84E-04 |
| 134 | MOC52     | 6487   | Hs.163645 | NM_176806;NM_183418;NM_004531           | -0.75 | -1.61 | 1.53E-04 | 1.52E-06 |
| 135 | MORC3     | 105283 | Hs.421150 | NM_015358                               | -0.41 | -0.81 | 1.77E-03 | 1.61E-05 |
| 136 | MPI       | 92346  | Hs.75694  | NM_002435                               | -0.90 | -1.21 | 3.90E-04 | 5.41E-05 |
| 137 | MRPL18    | 19031  | Hs.416998 | NM_014161                               | -0.62 | -1.02 | 3.76E-03 | 1.65E-04 |
| 138 | MRPS27    | 26419  | Hs.482491 | NM_015084                               | -0.67 | -0.95 | 3.12E-04 | 2.25E-05 |
| 139 | MTMR6     | 6713   | Hs.507536 | NM_004685                               | -0.33 | -0.75 | 1.97E-02 | 2.17E-04 |
| 140 | MYO10     | 18351  | Hs.481720 | NM_012334                               | -0.89 | -1.95 | 1.06E-02 | 1.20E-04 |
| 141 | NARS      | 8092   | Hs.465224 | NM_004539                               | -0.96 | -1.25 | 2.41E-05 | 6.42E-06 |
| 142 | NAT13     | 44026  | Hs.269528 | NM_025146                               | -1.06 | -1.69 | 1.05E-04 | 3.52E-06 |
| 143 | NAV3      | 116703 | Hs.306322 | NM_014903                               | -0.04 | -0.58 | 6.21E-01 | 3.50E-05 |
| 144 | NECAP1    | 26725  | Hs.555927 | NM_015509                               | -0.68 | -1.06 | 5.64E-04 | 3.50E-05 |
| 145 | NOLA1     | 144781 | Hs.69851  | NM_018983;NM_032993                     | -0.66 | -1.05 | 1.10E-03 | 6.61E-05 |
| 146 | NR2F2     | 35399  | Hs.347991 | NM_021005                               | -0.15 | -0.62 | 1.55E-01 | 1.81E-04 |
| 147 | NT5E      | 98661  | Hs.153952 | NM_002526                               | -1.03 | -2.84 | 1.08E-04 | 7.83E-07 |
| 148 | NTF3      | 95566  | Hs.99171  | NM_001102654;NM_002527                  | -0.41 | -0.83 | 1.61E-02 | 2.05E-04 |
| 149 | OBFC2A    | 39466  | Hs.591610 | NM_022837;NM_001031716                  | -1.20 | -2.67 | 2.93E-04 | 2.35E-06 |

|     |           |        |           |                                                            |       |       |          |          |
|-----|-----------|--------|-----------|------------------------------------------------------------|-------|-------|----------|----------|
| 150 | OSBPL11   | 41115  | Hs.477440 | NM_022776                                                  | -0.44 | -0.71 | 3.17E-03 | 1.38E-04 |
| 151 | OSBPL8    | 35282  | Hs.430849 | NM_001003712;NM_020841                                     | -0.24 | -0.78 | 1.89E-02 | 2.75E-05 |
| 152 | OSTM1     | 18875  | Hs.226780 | NM_014028                                                  | -1.51 | -2.02 | 1.78E-03 | 1.34E-04 |
| 153 | OXCT1     | 88233  | Hs.278277 | NM_000436                                                  | -0.69 | -0.76 | 2.98E-05 | 4.72E-06 |
| 154 | PALD      | 25632  | Hs.151220 | NM_016081                                                  | -0.48 | -0.58 | 9.27E-04 | 2.17E-04 |
| 155 | PAPOLA    | 48544  | Hs.253726 | NM_032632                                                  | -0.63 | -1.01 | 3.32E-05 | 4.01E-06 |
| 156 | PAWR      | 95633  | Hs.406074 | NM_002583                                                  | -0.53 | -0.84 | 4.02E-04 | 2.16E-05 |
| 157 | PCCA      | 89612  | Hs.80741  | NM_000282                                                  | -0.60 | -0.59 | 1.73E-04 | 5.86E-05 |
| 158 | PCDH18    | 36138  | Hs.591691 | NM_019035                                                  | -1.27 | -0.88 | 9.97E-05 | 2.00E-04 |
| 159 | PDHA1     | 89618  | Hs.530331 | NM_000284                                                  | -0.35 | -0.55 | 2.66E-03 | 1.86E-04 |
| 160 | PDS5A     | 24881  | Hs.331431 | NM_001100399;NM_015200                                     | -0.14 | -0.52 | 1.84E-01 | 6.34E-04 |
| 161 | PEA15     | 5529   | Hs.517216 | NM_003768                                                  | -0.73 | -1.54 | 2.03E-02 | 2.34E-04 |
| 162 | PEBP1     | 97200  | Hs.433863 | NM_002567                                                  | -0.76 | -1.39 | 3.24E-03 | 4.40E-05 |
| 163 | PERP      | 40750  | Hs.520421 | NM_022121                                                  | -0.03 | -0.58 | 8.74E-01 | 5.99E-04 |
| 164 | PHACTR2   | 26018  | Hs.102471 | NM_001100164;NM_001100166;NM_001100165;NM_014721           | -1.16 | -2.03 | 1.14E-02 | 2.74E-04 |
| 165 | PMP22     | 107586 | Hs.372031 | NM_153322;NM_153321;NM_000304                              | -0.90 | -1.92 | 2.59E-03 | 2.41E-05 |
| 166 | PODXL     | 12409  | Hs.16426  | NM_005397;NM_001018111                                     | -0.58 | -1.44 | 3.78E-03 | 1.88E-05 |
| 167 | POLE3     | 29616  | Hs.108112 | NM_017443                                                  | -1.61 | -1.71 | 3.66E-06 | 6.18E-07 |
| 168 | PPP2CB    | 5983   | Hs.491440 | NM_001009552;NM_004156                                     | -0.95 | -2.62 | 3.47E-05 | 5.66E-07 |
| 169 | PRDM5     | 127629 | Hs.132593 | NM_018699                                                  | -0.43 | -0.79 | 8.08E-03 | 2.52E-04 |
| 170 | PRKCI     | 97410  | Hs.478199 | NM_002740                                                  | -0.74 | -1.10 | 9.05E-03 | 6.92E-04 |
| 171 | PRNP      | 88018  | Hs.472010 | NM_000311;NM_183079;NM_001080121;NM_001080123;NM_001080122 | -0.27 | -0.93 | 5.24E-02 | 5.76E-05 |
| 172 | PRPF38A   | 163434 | Hs.5301   | NM_032864                                                  | -0.11 | -0.68 | 4.10E-01 | 2.13E-04 |
| 173 | PRR16     | 31194  | Hs.157461 | NM_016644                                                  | -0.43 | -0.84 | 2.01E-02 | 6.18E-04 |
| 174 | PRRG1     | 87342  | Hs.190341 | NM_000950                                                  | -0.17 | -0.60 | 1.21E-01 | 8.99E-05 |
| 175 | PRSS35    | 62024  | Hs.98381  | NM_153362                                                  | -1.13 | -1.82 | 2.24E-03 | 2.13E-04 |
| 176 | PSKH1     | 109612 | Hs.513683 | NM_006742                                                  | -1.09 | -0.59 | 1.19E-03 | 1.96E-02 |
| 177 | PTPN11    | 50403  | Hs.506852 | NM_002834                                                  | -0.36 | -1.32 | 3.35E-02 | 2.08E-05 |
| 178 | PUS7L     | 44546  | Hs.445814 | NM_031292;NM_001098614;NM_001098615                        | -0.56 | -0.62 | 1.76E-03 | 4.15E-04 |
| 179 | RAB11FIP2 | 24644  | Hs.173656 | NM_014904                                                  | -1.37 | -1.50 | 2.92E-04 | 8.41E-05 |
| 180 | RAB34     | 46380  | Hs.301853 | NM_031934                                                  | -0.76 | -0.88 | 1.29E-03 | 5.04E-04 |
| 181 | RAB6A     | 46558  | Hs.503222 | NM_002869;NM_198896;NM_001077637;NM_032144                 | -0.64 | -0.79 | 1.04E-03 | 1.02E-04 |
|     | RAB6A     | 96036  | Hs.591552 | NM_198896;NM_002869;NM_001077637;NM_032144                 | -0.73 | -0.90 | 2.22E-04 | 4.55E-05 |
|     | RAB6A     | 96036  | Hs.503222 | NM_198896;NM_002869;NM_001077637;NM_032144                 | -0.73 | -0.90 | 2.22E-04 | 4.55E-05 |
|     | RAB6A     | 96036  | Hs.591552 | NM_198896;NM_002869;NM_001077637;NM_032144                 | -0.73 | -0.90 | 2.22E-04 | 4.55E-05 |
| 182 | RAC1      | 108740 | Hs.413812 | NM_006908;NM_018890;NM_198829                              | -0.17 | -0.92 | 4.35E-01 | 6.46E-04 |
| 183 | RAD21     | 15081  | Hs.81848  | NM_006265                                                  | -0.39 | -1.22 | 7.47E-03 | 1.44E-05 |
| 184 | RAI14     | 26785  | Hs.431400 | NM_015577                                                  | -0.77 | -1.67 | 2.16E-05 | 6.68E-07 |
| 185 | RAP1B     | 26844  | Hs.369920 | NM_001089704;NM_015646;NM_001010942                        | -0.14 | -1.15 | 1.68E-01 | 1.36E-05 |
| 186 | RAP2A     | 33842  | Hs.508480 | NM_021033                                                  | -0.68 | -1.62 | 1.35E-02 | 6.24E-05 |
| 187 | RCN2      | 96066  | Hs.79088  | NM_002902                                                  | -1.49 | -2.48 | 2.88E-03 | 8.04E-05 |

|             |        |           |                                                               |       |       |          |          |
|-------------|--------|-----------|---------------------------------------------------------------|-------|-------|----------|----------|
| 188 RECK    | 118772 | Hs.388918 | NM_021111                                                     | -0.68 | -1.72 | 9.48E-03 | 3.99E-05 |
| 189 RHEB    | 9548   | Hs.438823 | NM_005614                                                     | -1.57 | -2.00 | 7.39E-06 | 9.94E-07 |
| 190 RND3    | 126716 | Hs.6838   | NM_005168                                                     | 0.50  | -1.40 | 1.22E-02 | 3.21E-05 |
| 191 RNF135  | 46770  | Hs.29874  | NM_032322;NM_197939                                           | -0.58 | -0.64 | 1.19E-03 | 4.96E-04 |
| 192 RNF26   | 43267  | Hs.524084 | NM_032015                                                     | -0.63 | -0.38 | 8.89E-04 | 9.46E-03 |
| 193 RPL17   | 130114 | Hs.374588 | NM_000985                                                     | -0.54 | -1.55 | 1.52E-02 | 5.00E-05 |
| 194 S100PBP | 41076  | Hs.440880 | NM_022753                                                     | -0.65 | -0.73 | 7.73E-04 | 1.47E-04 |
| 195 SACM1L  | 18867  | Hs.156509 | NM_014016                                                     | -0.78 | -0.83 | 7.43E-05 | 2.80E-05 |
| 196 SATB1   | 97734  | Hs.517717 | NM_002971                                                     | -0.59 | -1.06 | 6.23E-03 | 1.85E-04 |
| 197 SCN9A   | 96164  | Hs.2319   | NM_002977                                                     | -0.57 | -0.87 | 2.44E-04 | 1.74E-05 |
| SCN9A       | 170806 | Hs.2319   | NM_002977;AJ310897                                            | 0.11  | -0.45 | 5.89E-01 | 1.41E-02 |
| 198 SDCBP   | 11180  | Hs.200804 | NM_001007068;NM_001007069;NM_001007070;NM_005625;NM_001007067 | -0.99 | -2.66 | 1.42E-03 | 3.26E-06 |
| 199 SELT    | 27460  | Hs.369052 | NM_016275                                                     | 0.05  | -0.84 | 7.67E-01 | 1.26E-04 |
| 200 SERTAD2 | 24448  | Hs.591569 | NM_014755                                                     | -0.69 | -0.55 | 3.81E-04 | 1.24E-03 |
| 201 SESTD1  | 80632  | Hs.591613 | NM_178123                                                     | -0.92 | -0.59 | 8.04E-06 | 3.80E-05 |
| 202 SGK3    | 20197  | Hs.545401 | NM_001033578;NM_170709;NM_013257                              | -0.63 | -0.59 | 1.20E-03 | 7.22E-04 |
| 203 SH3BP4  | 22586  | Hs.516777 | NM_014521                                                     | -0.75 | -1.73 | 8.17E-03 | 4.45E-05 |
| 204 SKIV2L2 | 24972  | Hs.274531 | NM_015360                                                     | -0.66 | -1.22 | 5.67E-05 | 3.71E-06 |
| 205 SLC20A2 | 14142  | Hs.491611 | NM_006749                                                     | -0.61 | -1.16 | 6.56E-03 | 8.99E-05 |
| 206 SLC35F5 | 45676  | Hs.632527 | NM_025181                                                     | -0.70 | -1.90 | 2.89E-02 | 8.41E-05 |
| 207 SLC38A1 | 42656  | Hs.533770 | NM_001077484;NM_030674                                        | -0.14 | -0.82 | 3.28E-01 | 5.16E-04 |
| 208 SLFN11  | 62475  | Hs.462829 | NM_001104589;NM_152270;NM_001104588;NM_001104590;NM_001104587 | -0.89 | -0.37 | 5.89E-04 | 3.58E-02 |
| 209 SMAD3   | 9939   | Hs.36915  | NM_005902                                                     | -0.13 | -0.51 | 1.98E-01 | 2.21E-04 |
| 210 SMURF2  | 37800  | Hs.515011 | NM_022739                                                     | -0.32 | -1.39 | 2.77E-02 | 1.26E-05 |
| 211 SMYD2   | 33263  | Hs.66170  | NM_020197                                                     | -0.31 | -1.24 | 3.56E-02 | 2.37E-05 |
| 212 SOCS6   | 111250 | Hs.591068 | NM_004232;AF161545                                            | -0.65 | -0.94 | 7.43E-05 | 7.34E-06 |
| 213 SPIRE1  | 66320  | Hs.515283 | NM_020148                                                     | -0.84 | -0.97 | 8.43E-05 | 2.03E-05 |
| 214 SRXN1   | 56000  | Hs.516830 | NM_080725                                                     | -1.04 | -1.80 | 6.06E-03 | 1.42E-04 |
| 215 SSX2IP  | 20466  | Hs.22587  | NM_014021                                                     | -0.90 | -0.57 | 1.04E-03 | 4.63E-03 |
| 216 STRN3   | 22620  | Hs.401843 | NM_001083893;NM_014574                                        | -0.48 | -0.78 | 1.59E-02 | 6.55E-04 |
| 217 SUCLG2  | 73984  | Hs.186512 | NM_003848                                                     | -0.18 | -0.98 | 3.12E-02 | 4.19E-06 |
| 218 SUZ12   | 129955 | Hs.462732 | NM_015355                                                     | -0.08 | -1.50 | 7.08E-01 | 6.24E-05 |
| 219 TAF7    | 11204  | Hs.438838 | NM_005642                                                     | -0.86 | -1.58 | 1.71E-04 | 4.28E-06 |
| TAF7        | 11208  | Hs.438838 | NM_005642                                                     | -0.18 | -0.92 | 6.49E-01 | 7.15E-03 |
| 220 TBCA    | 8185   | Hs.291212 | NM_004607                                                     | -1.53 | -1.78 | 7.81E-05 | 1.40E-05 |
| 221 TCF12   | 96485  | Hs.511504 | NM_207036;NM_207037;NM_003205;NM_207038;NM_207040             | -0.43 | -1.02 | 1.75E-03 | 1.47E-05 |
| 222 TERF1   | 178729 | Hs.442707 | NM_003218;NM_017489                                           | -0.78 | -0.65 | 1.91E-04 | 3.93E-04 |
| 223 TMED5   | 27172  | Hs.482873 | NM_016040                                                     | -0.23 | -0.98 | 1.61E-01 | 2.22E-04 |
| 224 TMEM33  | 127309 | Hs.31082  | NM_018126                                                     | -1.28 | -1.71 | 1.87E-04 | 2.03E-05 |
| 225 TNS3    | 39358  | Hs.520814 | NM_022748                                                     | -0.69 | -0.91 | 5.33E-04 | 5.76E-05 |

|     |         |        |           |                                                                                                                                 |       |       |          |          |
|-----|---------|--------|-----------|---------------------------------------------------------------------------------------------------------------------------------|-------|-------|----------|----------|
| 226 | TOMM20  | 143603 | Hs.533192 | NM_014765                                                                                                                       | -0.67 | -0.86 | 3.50E-04 | 3.26E-05 |
| 227 | TPRKB   | 27191  | Hs.157401 | NM_016058                                                                                                                       | -1.29 | -1.28 | 3.90E-04 | 2.15E-04 |
| 228 | TRAM1   | 19201  | Hs.491988 | NM_014294                                                                                                                       | -2.89 | -4.20 | 1.46E-03 | 8.41E-05 |
| 229 | TRIP13  | 6094   | Hs.436187 | NM_004237                                                                                                                       | -1.49 | -1.58 | 7.66E-06 | 1.63E-06 |
| 230 | TSGA14  | 34406  | Hs.368315 | NM_018718                                                                                                                       | -1.03 | -1.29 | 2.08E-05 | 3.96E-06 |
| 231 | TSHZ3   | 36819  | Hs.278436 | NM_020856                                                                                                                       | -0.84 | -0.92 | 1.62E-03 | 4.30E-04 |
| 232 | TSPAN14 | 42822  | Hs.310453 | NM_030927                                                                                                                       | -1.04 | -0.76 | 1.08E-05 | 6.68E-06 |
| 233 | TULP4   | 34950  | Hs.486993 | NM_001007466;NM_020245                                                                                                          | -1.44 | -1.25 | 7.66E-06 | 8.66E-06 |
| 234 | TXNDC12 | 25401  | Hs.476033 | NM_015913                                                                                                                       | -1.55 | -1.42 | 2.06E-05 | 9.31E-06 |
| 235 | UBE2D3  | 99746  | Hs.518773 | NM_181891;NM_181887;NM_181888;NM_181892;NM_181886;NM_181893;NM_181890                                                           | -0.53 | -1.73 | 5.64E-04 | 2.17E-06 |
|     | UBE2D3  | 142694 | Hs.518773 | ;NM_003340;NM_181889<br>NM_181888;NM_181891;NM_181887;NM_181892;HSM804727;NM_181886;NM_181893<br>;NM_181890;NM_003340;NM_181889 | -0.42 | -1.96 | 1.90E-03 | 1.06E-06 |
| 236 | UBL3    | 16141  | Hs.145575 | NM_007106                                                                                                                       | -0.27 | -0.59 | 6.69E-03 | 1.93E-04 |
| 237 | USP33   | 24777  | Hs.480597 | NM_015017;NM_201624                                                                                                             | -0.54 | -0.80 | 3.62E-04 | 1.99E-05 |
| 238 | USP48   | 46651  | Hs.467524 | NM_032236                                                                                                                       | -0.53 | -0.33 | 1.54E-03 | 1.67E-02 |
| 239 | USP8    | 8980   | Hs.569446 | NM_005154                                                                                                                       | -0.55 | -0.79 | 2.02E-03 | 1.03E-04 |
| 240 | USP9X   | 107904 | Hs.77578  | NM_001039591;NM_001039590                                                                                                       | -0.28 | -0.57 | 9.71E-03 | 2.31E-04 |
| 241 | VAMP3   | 5265   | Hs.66708  | NM_004781                                                                                                                       | -0.72 | -1.34 | 2.69E-02 | 6.09E-04 |
| 242 | VEZF1   | 148281 | Hs.463569 | AK058024;NM_007146                                                                                                              | -0.75 | -0.60 | 6.06E-05 | 1.13E-04 |
| 243 | VGLL3   | 24138  | Hs.435013 | NM_016206                                                                                                                       | -0.83 | -1.30 | 1.74E-03 | 8.29E-05 |
| 244 | VPS4B   | 5406   | Hs.126550 | NM_004869                                                                                                                       | -0.85 | -1.17 | 1.12E-03 | 9.54E-05 |
| 245 | WDFY1   | 33696  | Hs.368359 | NM_020830                                                                                                                       | -0.62 | -1.38 | 9.59E-03 | 9.92E-05 |
| 246 | WDHD1   | 17707  | Hs.385998 | NM_001008396;NM_007086                                                                                                          | -0.39 | -0.58 | 7.07E-04 | 4.33E-05 |
| 247 | WEE1    | 98284  | Hs.249441 | NM_003390                                                                                                                       | -1.09 | -1.25 | 2.64E-03 | 6.63E-04 |
| 248 | WHSC1L1 | 109350 | Hs.608111 | NM_017778                                                                                                                       | -1.00 | -1.17 | 4.75E-04 | 1.31E-04 |
| 249 | WTAP    | 169662 | Hs.446091 | NM_152858;NM_152857;NM_004906                                                                                                   | -0.74 | -1.52 | 7.33E-03 | 6.66E-05 |
|     | WTAP    | 174545 | Hs.446091 | NM_152858;NM_152857                                                                                                             | -1.65 | -1.67 | 1.48E-03 | 1.39E-03 |
| 250 | XRN1    | 107026 | Hs.435103 | NM_019001;NM_001042604                                                                                                          | -0.30 | -0.87 | 6.64E-02 | 1.79E-04 |
| 251 | YWHAZ   | 98307  | Hs.492407 | NM_145690;NM_003406                                                                                                             | -0.68 | -1.78 | 5.39E-05 | 3.88E-07 |
| 252 | ZAK     | 106461 | Hs.444451 | NM_133646                                                                                                                       | -1.23 | -1.93 | 2.16E-05 | 1.15E-06 |
| 253 | ZDHHC2  | 124794 | Hs.443852 | NM_016353                                                                                                                       | -0.66 | -1.52 | 1.10E-03 | 8.43E-06 |
| 254 | ZFAND6  | 32963  | Hs.306329 | NM_019006                                                                                                                       | -0.81 | -1.57 | 2.28E-04 | 2.74E-06 |
| 255 | ZFP64   | 28947  | Hs.473082 | NM_199426;NM_018197;NM_022088                                                                                                   | -0.50 | -0.67 | 1.83E-03 | 1.45E-04 |
| 256 | ZMYM4   | 8883   | Hs.269211 | NM_005095                                                                                                                       | -0.41 | -1.05 | 7.35E-04 | 6.84E-06 |
| 257 | ZNF238  | 16779  | Hs.69997  | NM_006352;NM_205768                                                                                                             | -0.32 | -0.57 | 1.48E-02 | 3.32E-04 |
| 258 | ZNF294  | 158    | Hs.288773 | NM_015565                                                                                                                       | -0.09 | -0.95 | 6.79E-01 | 2.28E-04 |
| 259 | ZNF650  | 63872  | Hs.379548 | NM_172070                                                                                                                       | -0.01 | -0.68 | 9.41E-01 | 2.71E-05 |
| 260 | ZNF721  | 2272   | Hs.428360 | NM_133474                                                                                                                       | -0.65 | -0.68 | 6.67E-05 | 3.49E-05 |
